# Supplementary material
Source: HighWire-hosted journal article supplement (https://www.ajevonline.org/highwire/filestream/11955/field_highwire_adjunct_files/0/Supplemental_Data.pdf)
Supplement: Supplemental_Data.pdf [file Supplemental_Data.pdf]

**Supplemental Data for:**

Oliver CL, Cooper ML, Lewis Ivey ML, Brannen PM, Miles TD, Mahaffee WF and Moyer MM. 2021. Assessing the United States grape industry's understanding of fungicide resistance mitigation practices. *Am J Enol Vitic* 72:181-193. doi: 10.5344/ajev.2021.20062.

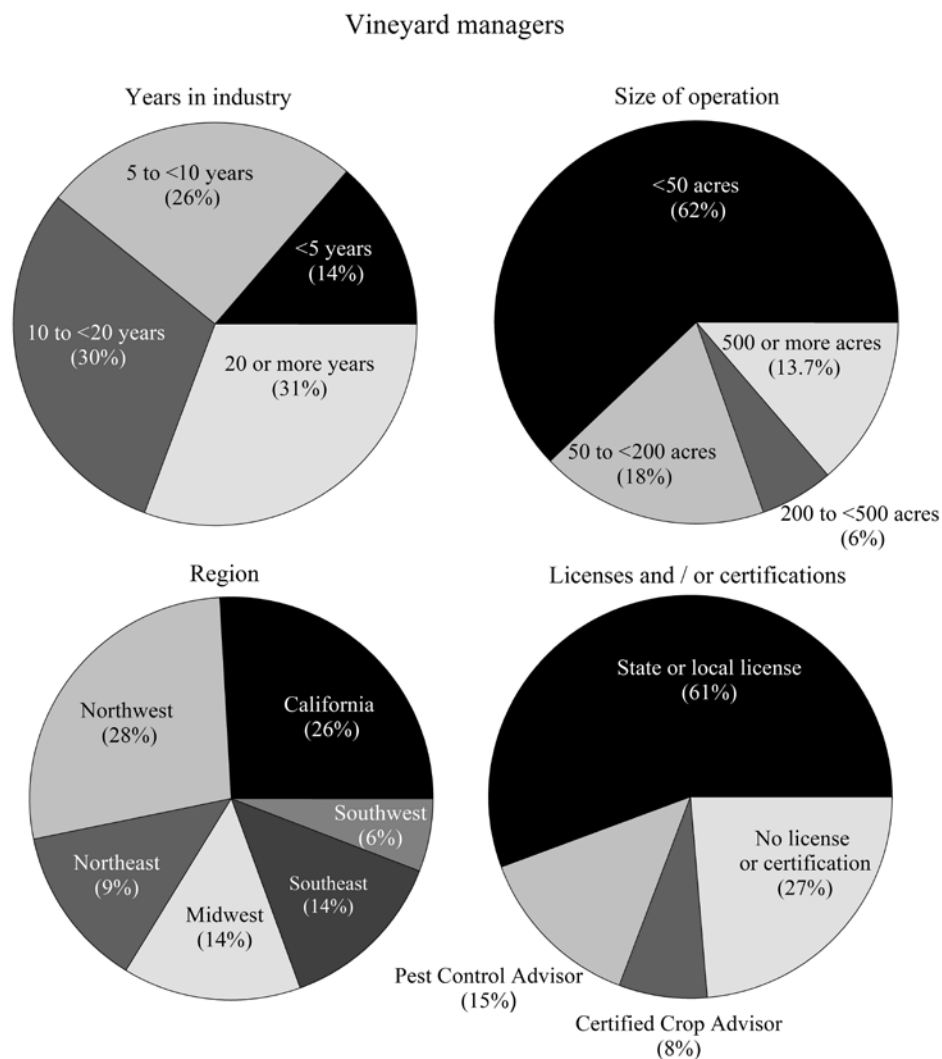

**Supplemental Figure 1** Key demographics (years in the industry, size of operation, region of location, and licenses held) of respondents who classified themselves as a vineyard manager. Vineyard managers were defined as someone who makes vineyard management decisions for vineyards owned by themselves or someone they work for.

**Supplemental Data for:**

Oliver CL, Cooper ML, Lewis Ivey ML, Brannen PM, Miles TD, Mahaffee WF and Moyer MM. 2021. Assessing the United States grape industry's understanding of fungicide resistance mitigation practices. *Am J Enol Vitic* 72:181-193. doi: 10.5344/ajev.2021.20062.

**Viticulturists or crop consultants**

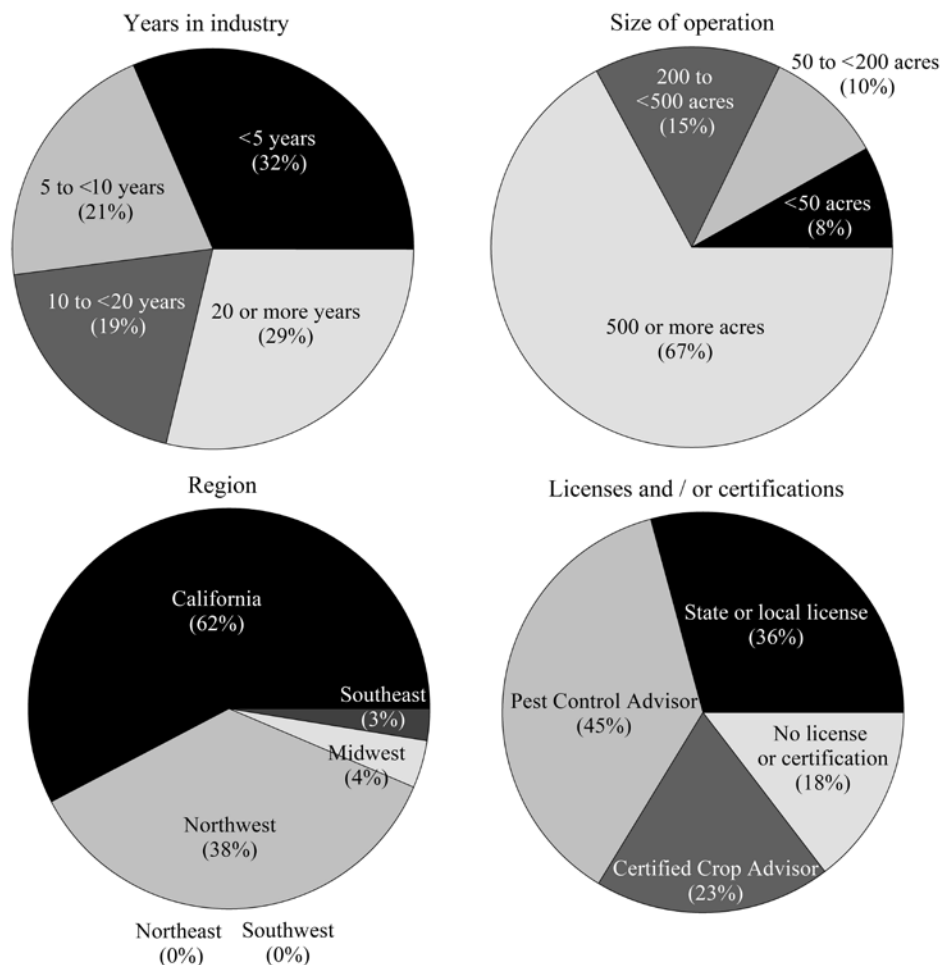

**Supplemental Figure 2** Key demographics (years in the industry, size of operation, region of location, and licenses held) of respondents who classified themselves a viticulturist or a crop consultant. A viticulturist or a crop consultant were defined as someone who provides recommendations for a vineyard owned by others.

**Supplemental Data for:**

Oliver CL, Cooper ML, Lewis Ivey ML, Brannen PM, Miles TD, Mahaffee WF and Moyer MM. 2021.  
Assessing the United States grape industry's understanding of fungicide resistance mitigation practices.  
Am J Enol Vitic 72:181-193. doi: 10.5344/ajev.2021.20062.

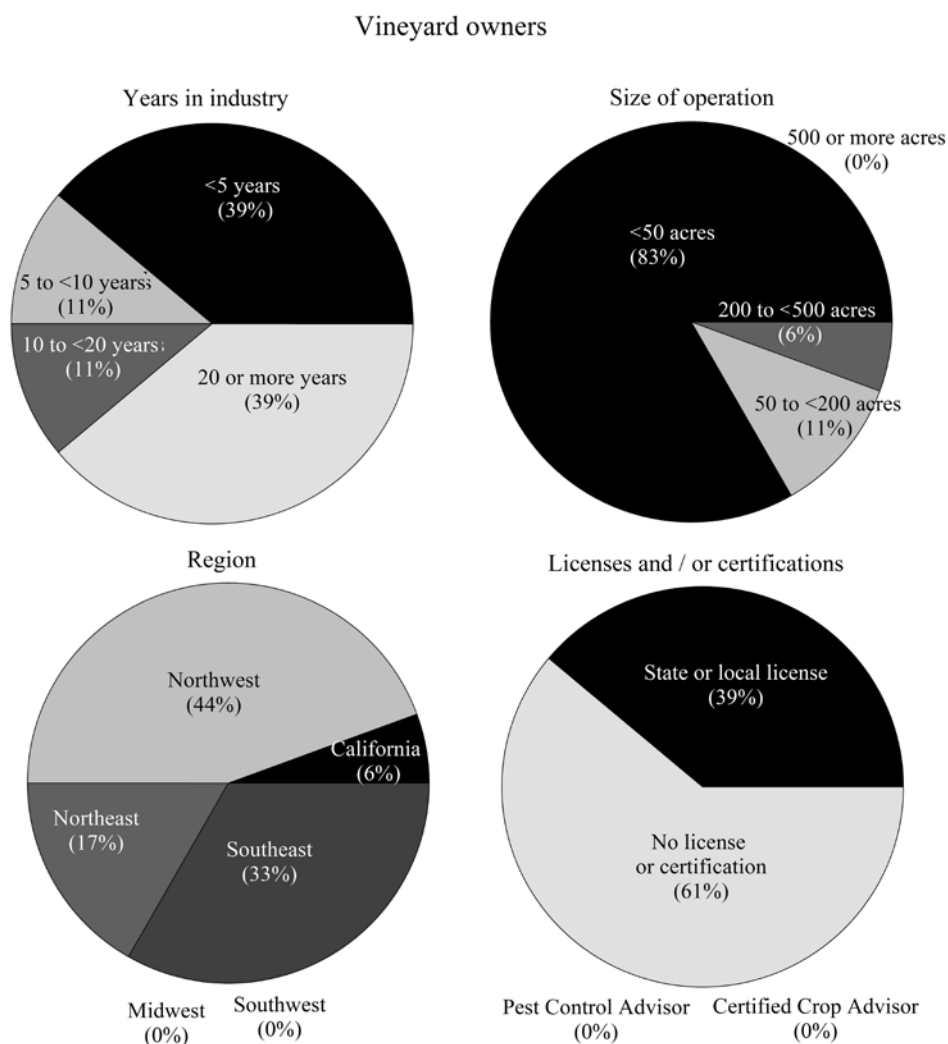

**Supplemental Figure 3** Key demographics (years in the industry, size of operation, region of location, and licenses held) by respondents who classified themselves as a vineyard owner. Vineyard owners were defined as those who own a vineyard but have no on-site management activities.

**Supplemental Data for:**

Oliver CL, Cooper ML, Lewis Ivey ML, Brannen PM, Miles TD, Mahaffee WF and Moyer MM. 2021. Assessing the United States grape industry's understanding of fungicide resistance mitigation practices. *Am J Enol Vitic* 72:181-193. doi: 10.5344/ajev.2021.20062.

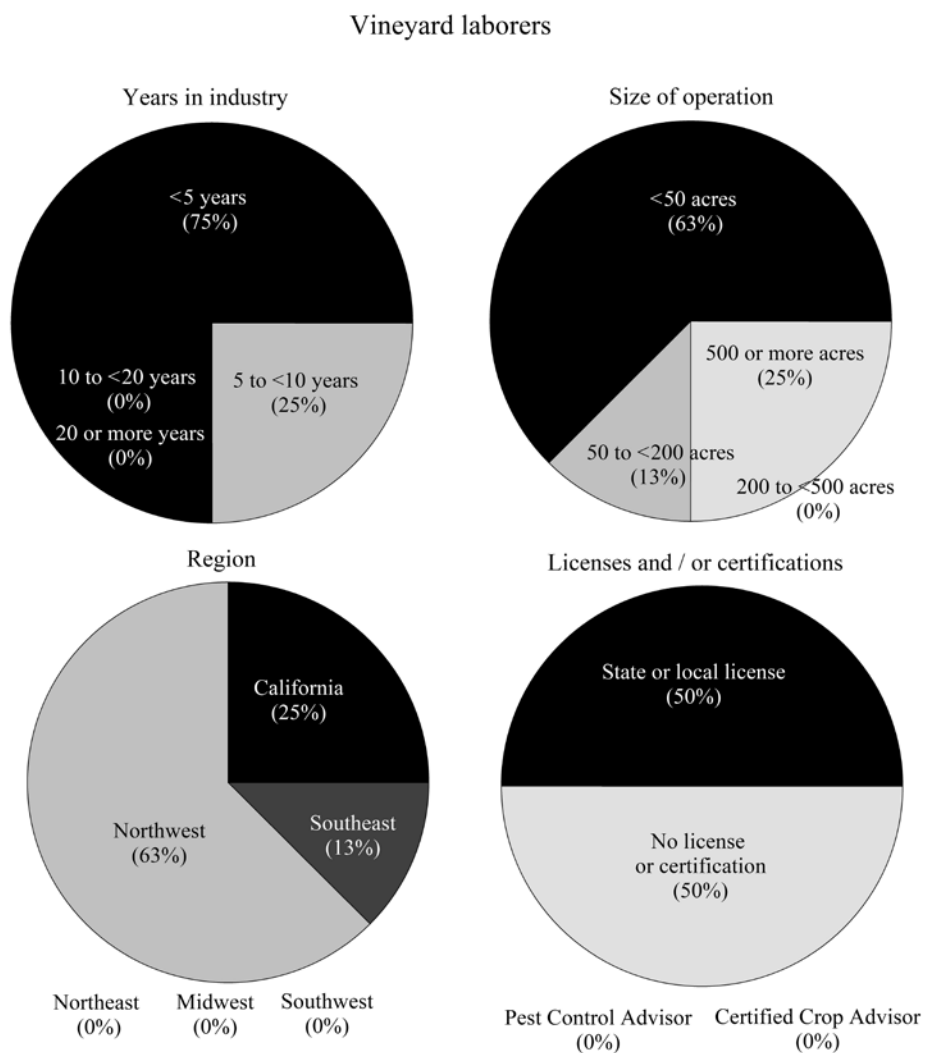

**Supplemental Figure 4** Key demographics (years in the industry, size of operation, region of location, and licenses held) of respondents who classified themselves as a vineyard laborer. Vineyard laborers were defined as someone who works at a vineyard but does not make vineyard management decisions.
